# Supplementary material for: A CBL-interacting protein kinase AdCIPK5 confers salt and osmotic stress tolerance in transgenic tobacco
Source: PubMed Central journal article supplement (PMC6962456; doi:10.1038/s41598-019-57383-x), 2020-01-15
Supplement: 41598_2019_57383_MOESM1_ESM.pdf [file 41598_2019_57383_MOESM1_ESM.pdf]

# **A CBL-interacting protein kinase *AdCIPK5* confers salt and osmotic stress tolerance in transgenic tobacco**

**Naveen Kumar Singh<sup>1,2\*</sup>, Pawan Shukla<sup>1,3</sup>, P. B. Kirti<sup>1,4</sup>**

**\*Corresponding author at: [naveenks11@gmail.com](mailto:naveenks11@gmail.com) (Naveen Kumar Singh)**

<sup>1</sup> Department of Plant Sciences, School of Life Sciences, University of Hyderabad, Hyderabad-500046, India

<sup>2</sup> Agricultural Research Organization-the Volcani Center, 68 HaMaccabim Road P.O.B 15159 Rishon LeZion 7505101, Israel

<sup>3</sup> Central Sericultural Research and Training Institute, Central Silk Board, NH-1A, Gallandar, Pampore - 192 121, J & K, India

<sup>4</sup> Agri Biotech Foundation, Rajendranagar, Hyderabad-500030, India

**Journal: Scientific Reports**

**Figure S1.** Nucleotide sequence showing 2,031 bp long *AdCIPK5* c-DNA sequence with 5' and 3' UTR sequences in lower case. Start and stop codons are mentioned in bold letters.

agcccaatcccaatcccaatcccaatctcaatatattccccctcactccattaataaattccatcacacaacacaaacttctcaacttccactcaacctaacccaaaaacggaaa  
aacataacccttatttttcccttcttttcttctctcttgcaagtacatacacaccggagttccaatctgggtgtacacctatgcaccatgaagatctcaacccttctgaatcct  
tttccgaaacgttggtgtcctcctggacactatattcctcaaaggaatgaacctctccaatctcaccactccacattctcctcctctcttggccatacaattagccttcccaa  
ccactaatcttaactaacttttcttttcttttctctctctctggaatcttctccc**ATG**GATCTGAAAAACGAGATGGAGATCAAGTTGTCTG  
AACAGCGCTAGGACGGTGATATTCAACAAGTACGAGATGGGACGCGTGTTAGGTCAGGGGAATTTTG  
CCAAGGTATACTACAGCAGGAACCTAGCGACGAACGAAAGTGTGGCGATTAAGGTGATAAAGAAGGA  
TAAGCTGAGGAAGGAGAGGCTGATAGAGCAGATTAAGAGAGAGGTTTCGGTTATGAGGCTGGTGAGG  
CATCCGAACATAGTGGAGCTGAAGGAAGTCATGGCCACGAAGGGGAAGATATTCTTGTTATGGAGT  
ATGTTAAGGGAGGCGAATTGTTCAAGAAAGTCGAGAAAGGGAAGCTCAAGGAAGATGTAGCTAGAAA  
GTATTTTCAGCAGTTGATCTCGGCCGTTGATTTCTGCCATAGCCGCGGCGTCACTCACAGAGATCTCAA  
GCCGGAGAATCTGCTGCTTGATGAGAATGAAGAGCTTAAGGTCTCCGATTTTGGCCTCTCTGCTTTGCC  
GGAACAACGCCGTGCAGATGGTATGCTGATAACACCGTGTGGAACACCTGCATATGTGGCACCAGAA  
GTGTTGAAGAAGAAAGGGTATGATGGATCCAAAGCAGATATATGGTCTTGTGGAGTGATTCTTTATGC  
TCTGGTTTGTGGCTATCTACCCTTCCAAGGCGAAAACGTGATGAGAATCTACAGAAAAGCCTTCAAGG  
CTCAGTATGAATCCCTGATTGGGTTCCGGAAGGAGCAAAGAACTTGATCTCAAACCTACTTGTAGCT  
GATCCTGAAAAGAGGTTCTCAATTGCAGATATCATGAAGGATCCTTGGTTCCAAGTCGGCTTCATGCG  
TCCGATTGCATTCTCCTTTAAGGAGTCTGCCATTGGGGACAATGTGGATGACTTCGATGAGGATGATA  
GTGATAGTAATAACAATCAAGAGTTTAACAAGGATGATTTGAAGCAGAGTAGTTCTGCTAAGCCTGCG  
CGGCCGTTTTACAATGCTTTTCGAGATAATTTCCCTCGCTGTCGCATGGTTTTGATCTGAGGAGTTTGTTTG  
AGACAAGGAAGAGGTCACCTTCAGTGTTTATATCAAAGCTTTCCGGCTCAAGCAGTGGTGGGGAAGCTA  
GAGGCTATGGCGAAGAAATTGAATTTCAAGTGGCCGGAAGAAGAAGAAGGAGTTTGTGTGAGGA  
TGGAAGGGGAGAGGGAAGGGAGGAAAGGGAGGCTGGCCATGACGGTGAAGTGTTCGAGGTGGCGC  
CGGAGGTGGCCGTGGTGGAGTTCTCGAAGTCTTCTGGGGATACCTTGGAGTATATCAAATTCTGTGAG  
GAAGAAGTTAGGCCTTCATTGAATGACATTGTTTGGAGTTGGCAGGGAGATGGTAACAAC**TAA**taacta  
gtcatgccattgggattatttgcctatggtgtcttcttttactgtttgatgcagctatataataatagtttgattgcataataagtaaaagaaaaggaagatgctaggaaag  
aaataatgctgattttgattttagttacagagatttcatttcatttgttaaaaaattgagtttagtttctgatgatggttgagtaataactgaaaaaaaaaaaaaa



**Figure S3.** Phylogenetic tree of AdCIPK5 and related protein kinases: AduCIPK5 of *Arachis duranensis*; GmCIPK5 of *Glycine max*; AtCIPK 1–26 of *Arabidopsis thaliana*.

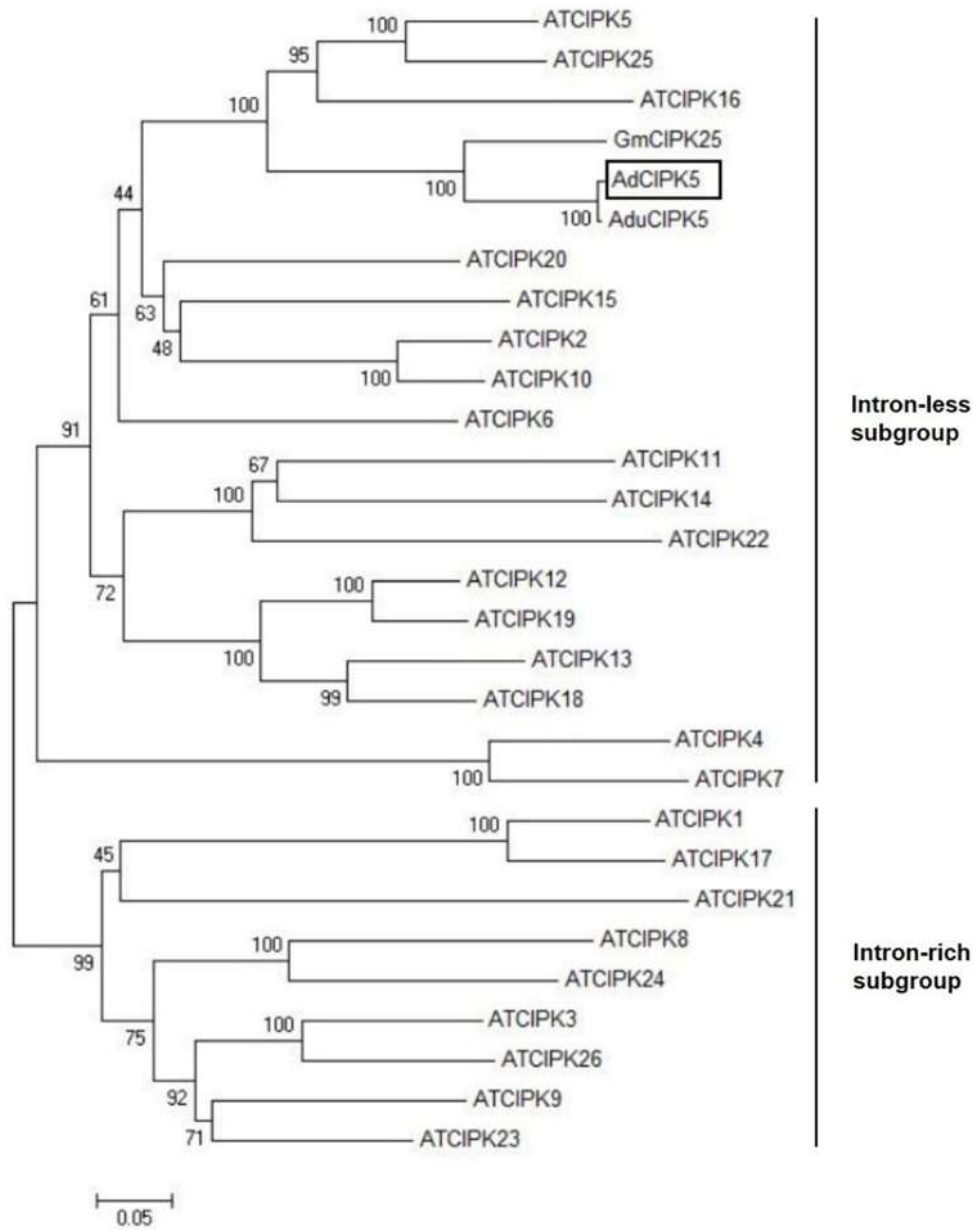

**Figure S4.** Gel pictures showing 739 bp amplified PCR product of *nptII* (A) and 1386 bp of *AdCIPK5* ORF (B) from genomic DNA of nine different putative T<sub>0</sub> transgenic lines and WT plants. Letter M represents  $\lambda$  *EcoRI/HindIII* DNA ladder.

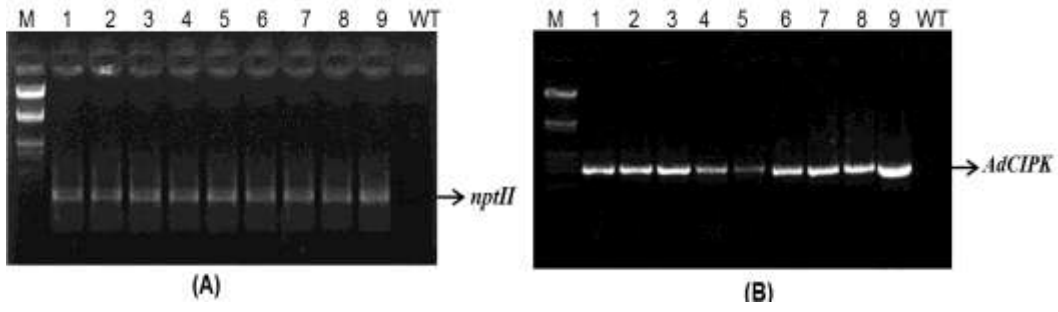

**Figure S5.** Semi-quantitative RT-PCR analysis of *AdCIPK5* gene in putative T<sub>0</sub> (A) and T<sub>2</sub> (B) transgenic plants. Lane 1 and 6 represent high expression lines and lane 2 represent the low expression line. *Actin* served as internal control to demonstrate equal loading

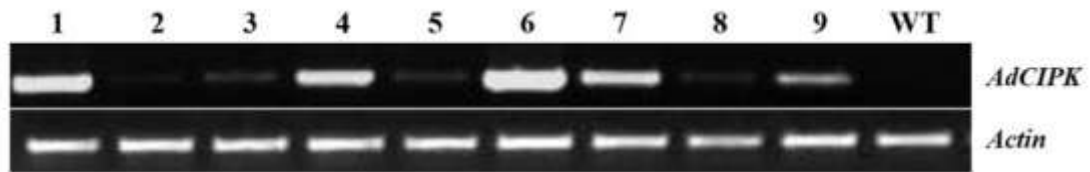

(A)

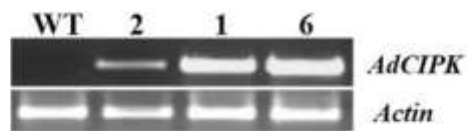

(B)

**Figure S6.** Resistance to fungal infection was checked in mature leaves of WT and T<sub>2</sub> transgenic plants against *Phytophthora parasitica* var. *nicotianae* after 5 d of treatment (**a**). No differences were observed between wild type and transgenic lines in terms of damaged leaf area and tissue cell death (**b and c**). Data represent means  $\pm$ SE of three replicates and same letters indicate no significant difference among the lines.

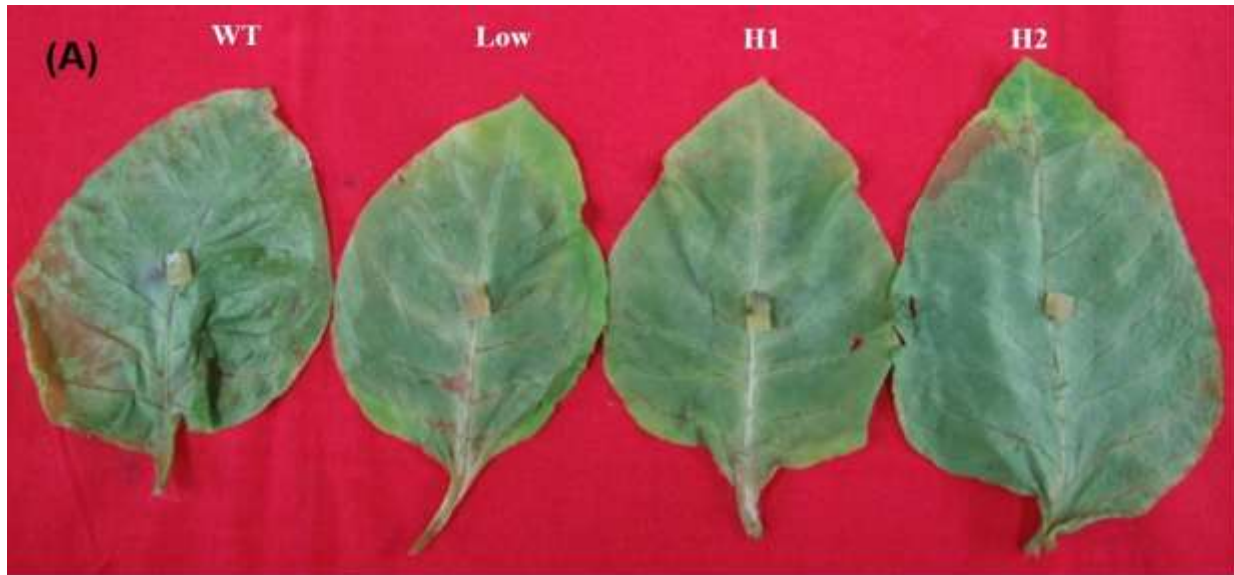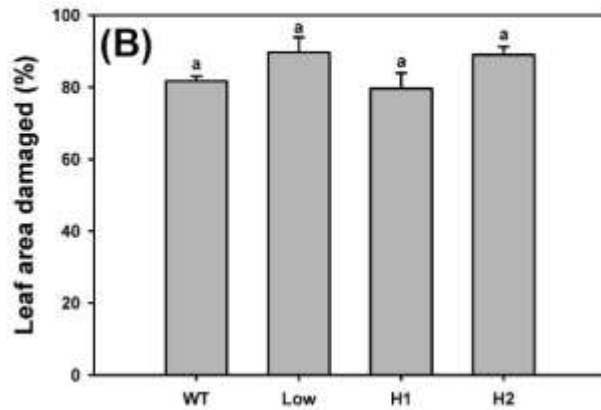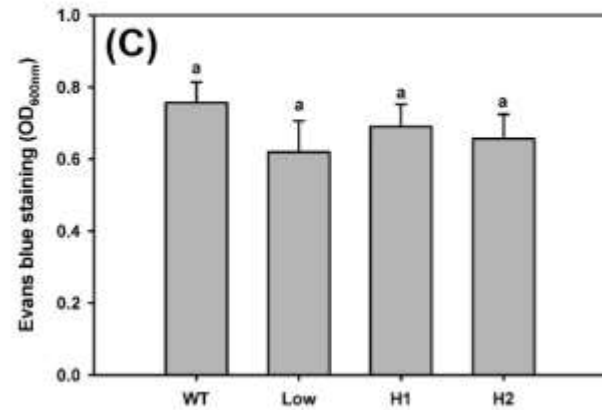

**Table S1.** Sequences of the oligonucleotides used for RACE, cloning and PCR analysis (see text for details).

| Name of the primers    | Primer sequences (5'-3')                                                                           |
|------------------------|----------------------------------------------------------------------------------------------------|
| SMARTer II A oligo     | AAG CAG TGG TAT CAA CGC AGA GTA CGC GGG                                                            |
| 5' CDS                 | 5'-(T) <sub>25</sub> V N-3' (N=A, C, G or T; V= A, G or C)                                         |
| 3' CDS                 | AAGCAGTGGTATCAACGCAGAGTAC(T) <sub>30</sub> V N<br>(N=A, C, G or T; V=A, G or C)                    |
| Universal Primer A Mix | Long 5'-<br>CTAATACGACTCACTATAGGGCAAGCAGTGGTATCAACGCAGAGT-3'<br>Short 5'-CTAATACGACTCACTATAGGGC-3' |
| Nested Primer          | AAGCAGTGGTATCAACGCAGAGT                                                                            |
| 5'GSP-1                | AGAACTACTCTGCTTCAA                                                                                 |
| 5'GSP-2                | CATCCTCATCGAAGTCATCCA                                                                              |
| 5'GSP-3                | AAAGGAGAATGCAATCGGACG                                                                              |
| 3' GSP1                | TGGATGACTTCGATGAGGATG                                                                              |
| ORF-F1                 | GCCATGGATCTGAAAAACGAGATGGA                                                                         |
| ORF-R1                 | CCACTAGTGTTGTTACCATCTCCCT                                                                          |
| ORF-F2                 | CCGGGCCCATGGATCTGAAAAACGAGATGGA                                                                    |
| ORF-R2                 | CCGGTACCTTAGTTGTTACCATCTCCCTGC                                                                     |



**Table S2.** Sequences of the oligonucleotides used in qRT-PCR (see text for details). Nt: *Nicotiana tabacum*; Ad: *Arachis diogeni*.

| <b>Oligo name</b> | <b>Forward (5'-3')</b> | <b>Reverse (5'-3')</b>   |
|-------------------|------------------------|--------------------------|
| <i>NtCAT</i>      | GGCCGCTACAACCTCTCTCTTT | ACAGGACCTCTTGCACCAAC     |
| <i>NtERD10C</i>   | AAAGCCAACCTCATGCCCAAG  | AGAGCTGCTACTTGATCGATGG   |
| <i>NtERD10D</i>   | GCACGAGGGAAGAAGAGAAGG  | TGGAGGCGCCACTTCCTC       |
| <i>NtNCED1</i>    | TGTCTGAAATGATCCGGGGC   | AGTTTCCGGCTCTTCCCAAG     |
| <i>NtSUS1</i>     | CACGGATATTTGCCCCAGGA   | GCAGCAGCCGAGTAGCAATA     |
| <i>NtSOS1</i>     | CAAATGTTATCCCCGAAAGC   | CGGAGAACCTGAGGAAATGTGA   |
| <i>NtUbq</i>      | GAGTCAACCCGTCACCTTGT   | ACATCTTTGAGACCTCAGTAGACA |
| <i>Adadh3</i>     | GACGCTTGGCGAGATCAACA   | AACCGGACAACCACCACATG     |
| <i>Adcipk</i>     | CCATGACGGTGGAAGTGTTT   | TACCATCTCCCTGCCAACTC     |
